# Supplementary material for: Exposure to West Nile Virus Increases Bacterial Diversity and Immune Gene Expression in Culex pipiens
Source: PubMed Central journal article supplement (PMC4632394; doi:10.3390/v7102886), 2015-10-27
Supplement: viruses-07-02886-s001.pdf [file viruses-07-02886-s001.pdf]

## Supplementary Materials

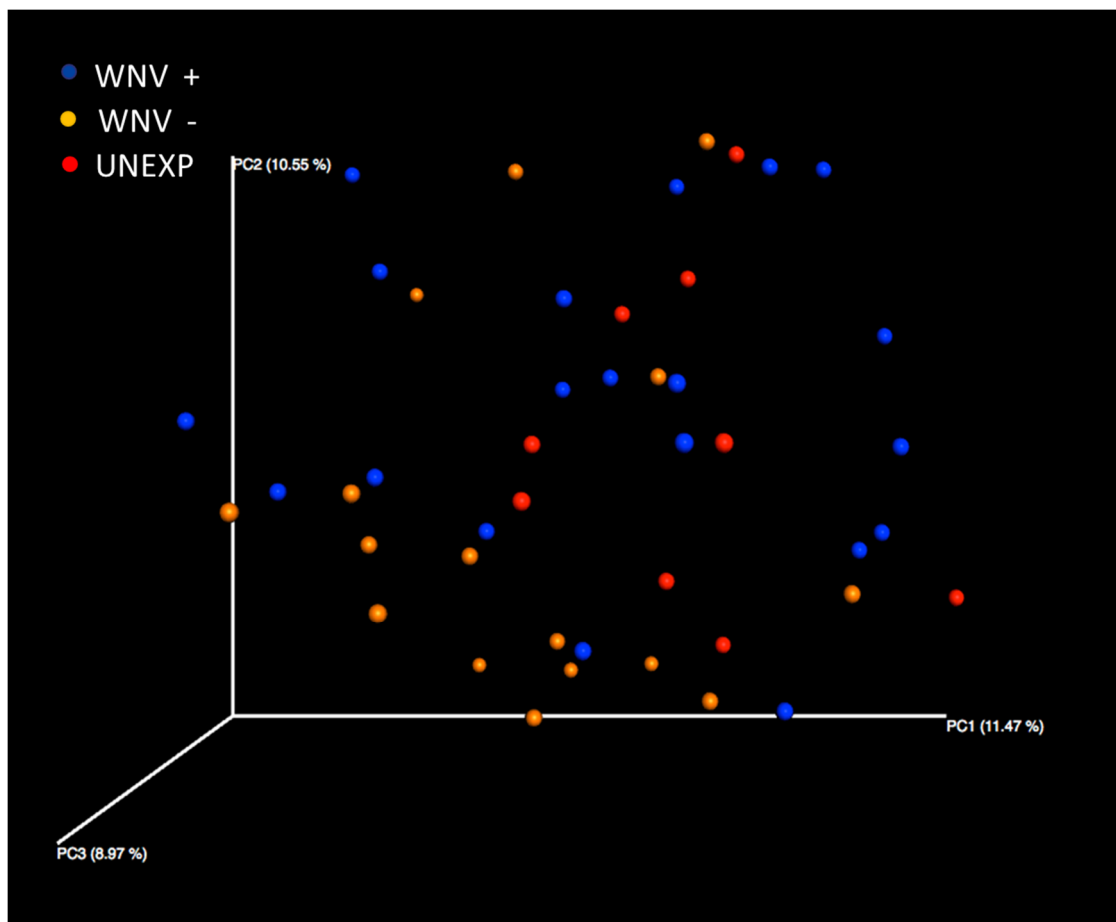

**Supplementary Figure 1.** PCoA plots for *Cx. pipiens* microbiome at 7 days post blood feeding for unexposed (UNEXP), WNV negative (-) and WNV positive (+) mosquitoes. Plots were generated by Qiime v1.09.

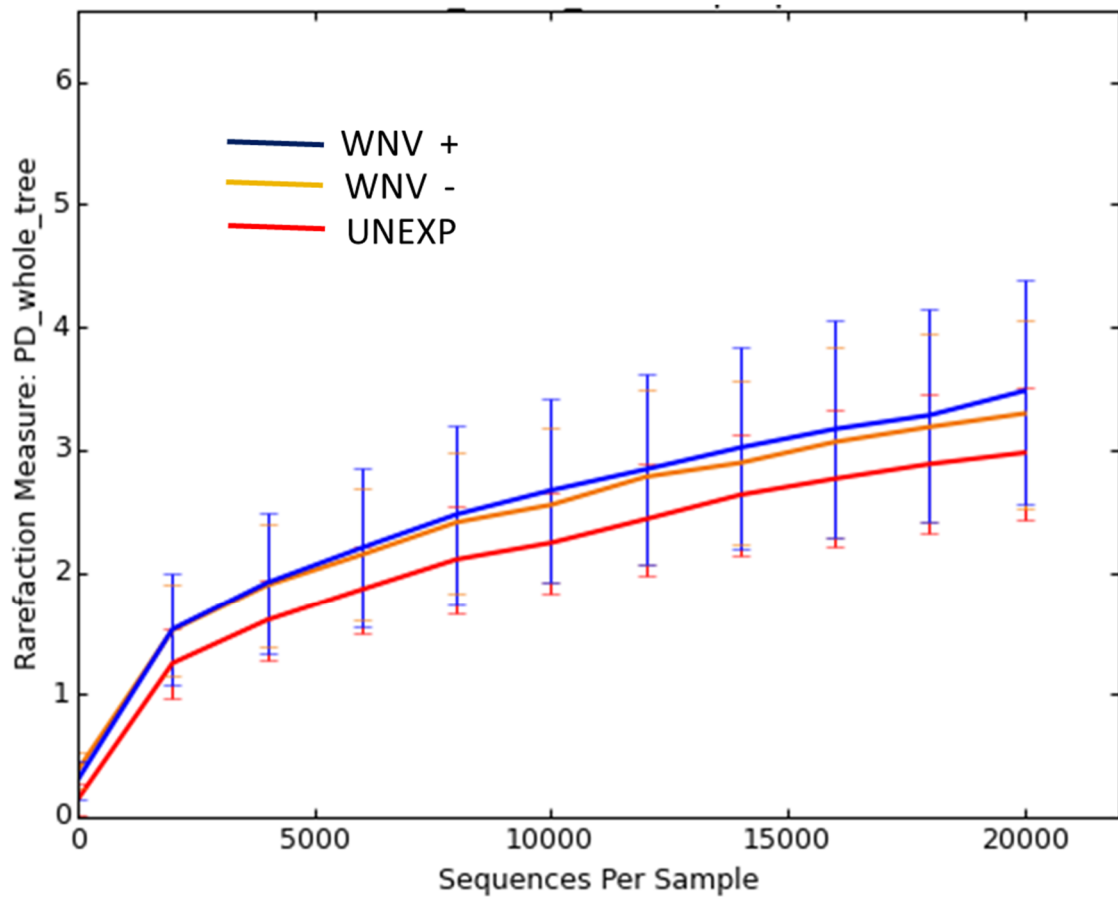

**Supplementary Figure 2.** Alpha diversity *vs.* sequence depth for *Cx. pipiens* microbiome at 7 days post blood feeding for unexposed (UNEXP), WNV negative (-) and WNV positive (+) mosquitoes. Plots were generated by Qiime v1.09.

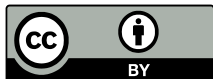

© 2015 by the authors; licensee MDPI, Basel, Switzerland. This article is an open access article distributed under the terms and conditions of the Creative Commons by Attribution (CC-BY) license (<http://creativecommons.org/licenses/by/4.0/>).
